# Supplementary material for: Iron/ROS/Itga3 mediated accelerated depletion of hippocampal neural stem cell pool contributes to cognitive impairment after hemorrhagic stroke
Source: PubMed Central journal article supplement — Redox Biol. 2024 Feb 13;71:103086. doi: 10.1016/j.redox.2024.103086 (PMC10883838; doi:10.1016/j.redox.2024.103086), 2024-02-13
Supplement: mmc1.pdf [file mmc1.pdf]

**Supple Table 1 Demographics and baseline data of Control and ICH**

|                                   | Control (n=30) | ICH (n=91)      | P      |
|-----------------------------------|----------------|-----------------|--------|
| Sex male, n (%)                   | 16 (53.3)      | 63 (69.2)       | 0.113  |
| Age ( $\bar{X}\pm S$ , years)     | 54.3 $\pm$ 9.2 | 54.3 $\pm$ 10.0 | 0.997  |
| Education                         |                |                 |        |
| Postgraduate, n (%)               | 2 (6.7)        | 4 (4.4)         | 0.673  |
| Undergraduate, n (%)              | 5 (16.7)       | 8 (8.8)         | 0.227  |
| Secondary school, n (%)           | 19 (63.3)      | 60 (65.9)       | 0.795  |
| Primary school, n (%)             | 4 (13.3)       | 18 (19.8)       | 0.427  |
| Psychological consultation, n (%) | 0 (0)          | 0 (0)           | —      |
| Antidepressant, n (%)             | 0 (0)          | 0 (0)           | —      |
| Parkinson's disease, n (%)        | 0 (0)          | 0 (0)           | —      |
| Huntington, n (%)                 | 0 (0)          | 0 (0)           | —      |
| Alzheimer's disease, n (%)        | 0 (0)          | 0 (0)           | —      |
| Hypertension, n (%)               | 4 (13.3)       | 84 (92.3)       | 0.000  |
| Hyperlipidemia, n (%)             | 3 (10.0)       | 4 (4.4)         | 0.254  |
| Diabetes, n (%)                   | 1 (3.3)        | 6 (6.6)         | 0.680* |
| Warfarin treatment, n (%)         | 0 (0)          | 1 (1.1)         | 1.000* |
| History of stroke, n (%)          | 0 (0)          | 0 (0)           | —      |
| Smoking, n (%)                    | 7 (23.3)       | 35 (38.5)       | 0.131  |
| Alcohol abuse, n (%)              | 10 (33.3)      | 45 (49.5)       | 0.124  |

\*Fisher's exact test. ICH: intracerebral hemorrhage

**Supple Table 2 Demographics and baseline data of CI and no CI group in ICH**

| Spontaneous ICH (n=91)            | CI (n=30)           | No CI (n=61)       | P      |
|-----------------------------------|---------------------|--------------------|--------|
| Sex male, n (%)                   | 20 (66.7)           | 43 (70.5)          | 0.710  |
| Age ( $\bar{X}\pm S$ , years)     | 57.8 $\pm$ 9.2      | 53.1 $\pm$ 10.3    | 0.071  |
| Education                         |                     |                    |        |
| Postgraduate, n (%)               | 1 (3.3)             | 3 (4.9)            | 1.000* |
| Undergraduate, n (%)              | 2 (6.7)             | 6 (9.8)            | 1.000* |
| Secondary school, n (%)           | 19 (63.3)           | 41 (67.2)          | 0.714  |
| Primary school, n (%)             | 8 (26.7)            | 11 (15.9)          | 0.213  |
| Psychological consultation, n (%) | 0 (0)               | 0 (0)              | —      |
| Antidepressant, n (%)             | 0 (0)               | 0 (0)              | —      |
| Parkinson's disease, n (%)        | 0 (0)               | 0 (0)              | —      |
| Huntington, n (%)                 | 0 (0)               | 0 (0)              | —      |
| Alzheimer's disease, n (%)        | 0 (0)               | 0 (0)              | —      |
| Hypertension, n (%)               | 27 (90.0)           | 55 (90.2)          | 0.980  |
| Hyperlipidemia, n (%)             | 1 (3.3)             | 2 (3.3)            | 0.989  |
| Diabetes, n (%)                   | 5 (16.7)            | 1 (1.6)            | 0.007  |
| Warfarin treatment, n (%)         | 1 (3.3)             | 0 (0)              | 0.248* |
| History of stroke, n (%)          | 0 (0)               | 0 (0)              | —      |
| Smoking, n (%)                    | 8 (26.7)            | 27 (44.3)          | 0.105  |
| Alcohol abuse, n (%)              | 13 (40.0)           | 31 (50.8)          | 0.331  |
| Admission GCS, median (IQR)       |                     |                    |        |
| Location                          |                     |                    |        |
| Basal ganglia, n (%)              | 12 (40.0)           | 35 (57.4)          | 0.119  |
| Intraventricular Extension, n (%) | 13 (43.3)           | 19 (31.1)          | 0.252  |
| Others, n (%)                     | 5 (26.7)            | 7 (11.5)           | 0.521* |
| ICH volume, median (IQR), mL      | 34 (27-50)          | 19 (10-27)         | 0.000  |
| GCS Admission, median (IQR)       | 10 (8-14)           | 13 (12-15)         | 0.000  |
| Phase shift values, median (IQR)  | -1.27 (-2.31—-1.19) | -1.89 (-2.06-0.17) | 0.000  |
| Surgery, n (%)                    | 6 (20.0)            | 6 (9.8)            | 0.200* |

\*Fisher's exact test. IQR: inter-quartile range, CI: cognitive impairment, ICH: intracerebral hemorrhage, GCS: Glasgow coma scale

**Supple Table 3 multivariate analysis of CI in ICH**

|                            | <b>OR (95%CI)</b> | <b><i>P</i></b> |
|----------------------------|-------------------|-----------------|
| GCS (1 decrease)           | 1.50 (1.21-1.72)  | 0.000           |
| ICH volume (10mL increase) | 1.73 (1.14-2.69)  | 0.000           |
| Phase shift values         | 1.40 (1.18-1.84)  | 0.006           |

OR: odds ratio, CI: cognitive impairment, GCS: Glasgow coma scale

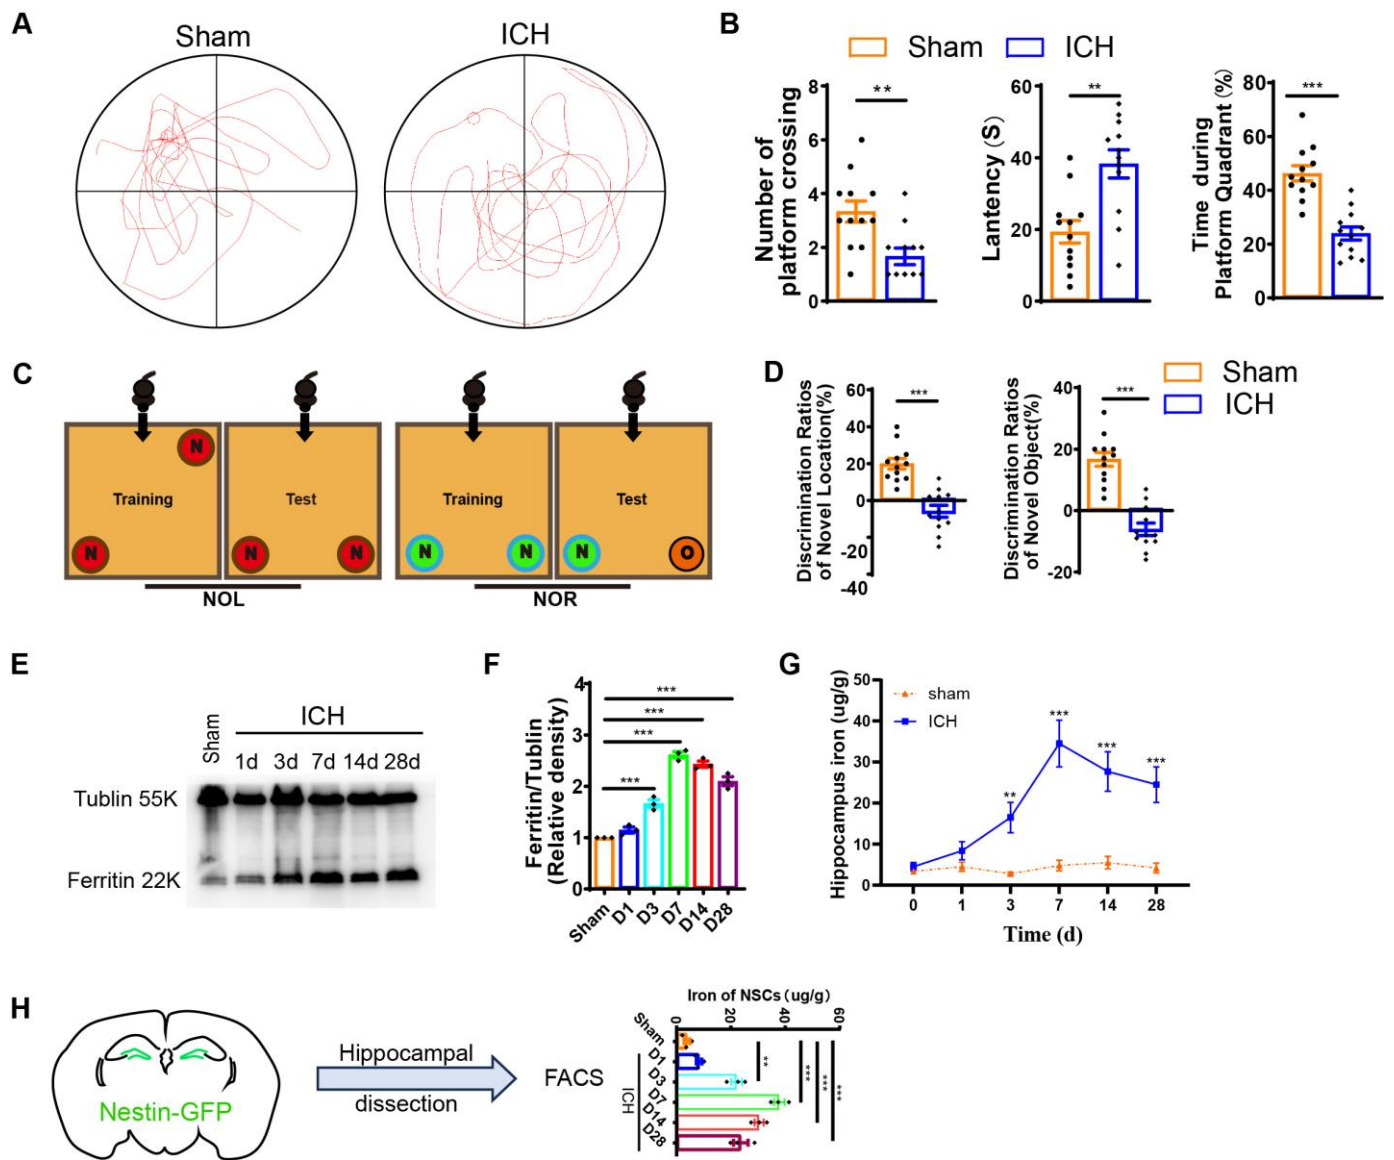

**Figure S1. Iron deposition in hippocampus mediates the effect of ICH on cognitive impairments in mice**

(A) Representative images of the swimming path of Sham and ICH mice during the probe trial test in Morris water maze test at 90 days after ICH.

(B) Platform-crossing times of Sham and ICH mice during probe trial test. Escape latency of probe trial test of Sham and ICH mice. Duration of stay in the platform quadrant. (n=12 for each group).

(C) Schematic diagram of novel object location and novel object recognition test.

(D) Quantification of the ratio of exploration time on novel objective location and novel object recognition in Sham and ICH mice at 90 days after ICH. (n=12 for each group).

(E-F) Bands showing temporal pattern of Ferritin expression in hippocampus after ICH.

Semi-quantitative analysis of WB results of Ferritin. Tublin was served as the internal control. (n=3 for each time point in each group).

(G) Time course of iron content in hippocampus between control and ICH mice. (n=6 for each time point in each group).

(H) Schematic diagram showing isolation of endogenous GFP<sup>+</sup> NSCs from the hippocampus using FACS. Quantified intracellular iron level in NSCs from Sham and ICH group at 1, 3, 7, 14 and 28 days after ICH. (n=3 for each time point).

(B, D, F, G, H) \*P < 0.05; \*\*P < 0.01; \*\*\*P < 0.001 vs corresponding Sham. Each experiment was repeated at least 3 times independently.

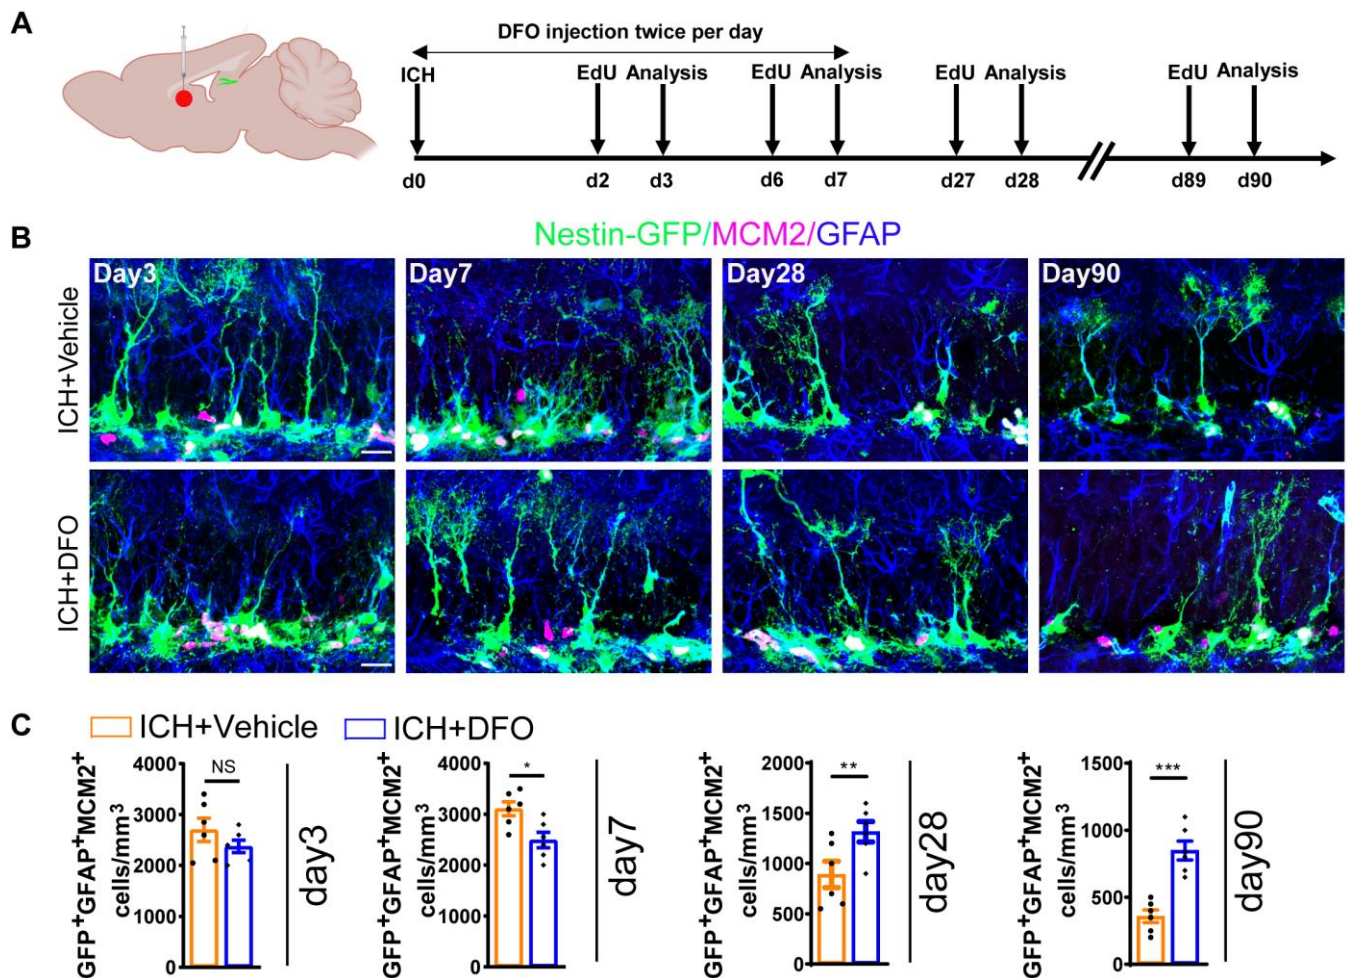

**Figure S2. DFO can alleviate ICH-induced iron deposition, NSCs over-activation and exhaustion of NSCs pool**

(A) Schematic diagram of the ICH model, as well as experimental timeline for cell proliferation analysis of ICH group with or without DFO treatment.

(B) Representative images of brain section stained with MCM2, GFAP, and genetically labeled GFP in the DG 3, 7, 28 and 90 days in ICH mice with or without DFO treatment. Scale bar = 20  $\mu$ m.

(C) Quantification of numbers of proliferating rNSCs (GFP<sup>+</sup>GFAP<sup>+</sup>MCM2<sup>+</sup>) cells from D. (n=6 for each group).

(C.) \*P < 0.05; \*\*P < 0.01; \*\*\*P < 0.001 vs corresponding ICH+Vehicle. NS= no significance. Each experiment was repeated at least 3 times independently.

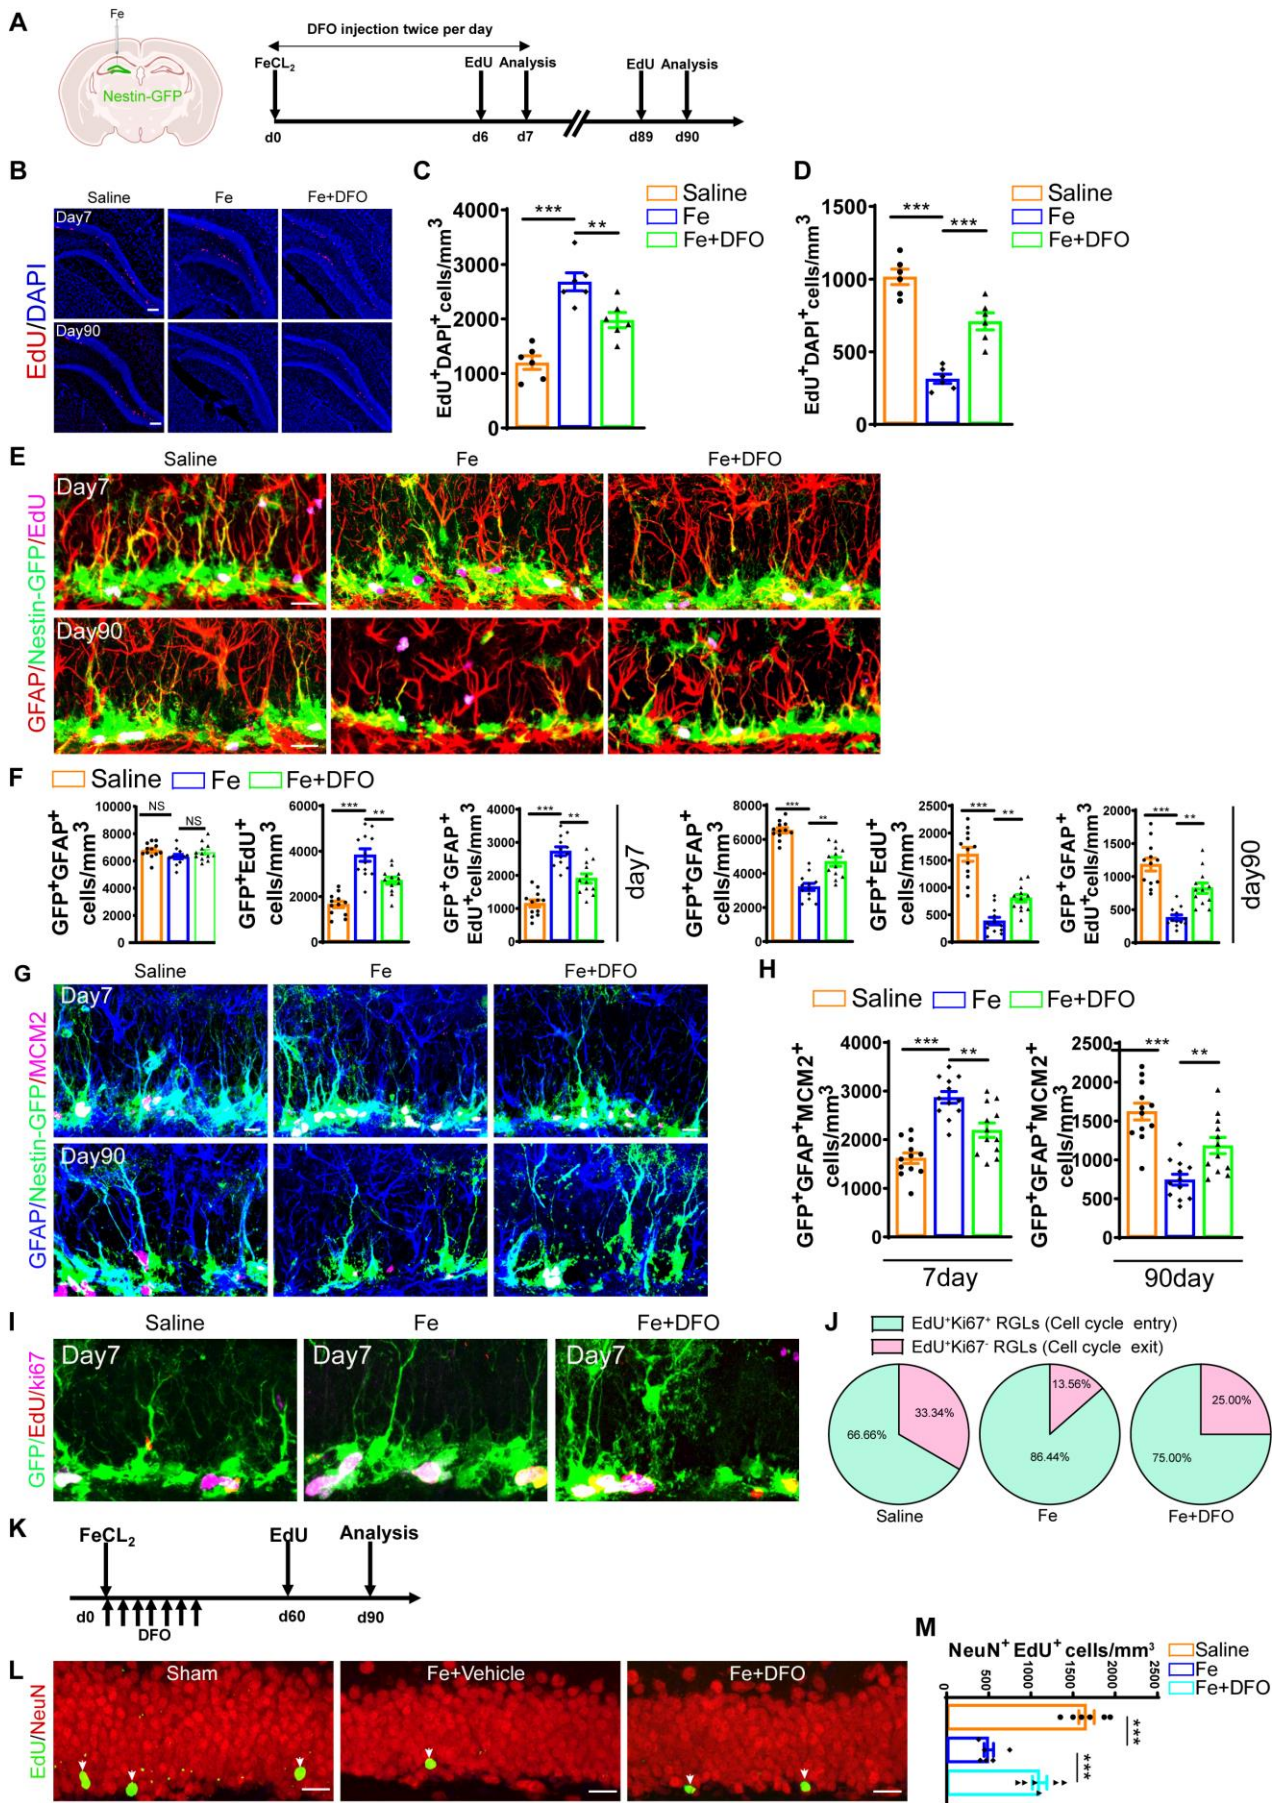

### **Figure S3. Injection of FeCl<sub>2</sub> recapitulates overactivation and exhaustion of the NSC pool**

(A) Schematic diagram of FeCl<sub>2</sub> or saline injection to the hippocampus of mice and experimental timeline for cell proliferation analysis of FeCl<sub>2</sub> group with or without DFO treatment.

(B) Representative images of EdU<sup>+</sup> cells in the DG after 24hours EdU pulse labeling of Sham and FeCl<sub>2</sub>, FeCl<sub>2</sub>+DFO group. Scale bar = 100 μm.

(C) Quantification of numbers of EdU<sup>+</sup>DAPI<sup>+</sup> cells from B at 7 days. (n=6 for each group).

(D) Quantification of numbers of EdU<sup>+</sup>DAPI<sup>+</sup> cells from B at 90 days. (n=6 for each group).

(E) Representative images of brain section stained with EdU, GFAP, and genetically labeled GFP in the DG of FeCl<sub>2</sub> group at 7 and 90 days after surgical manipulations. Scale bar = 20 μm.

(F) Quantification of numbers of rNSCs (GFP<sup>+</sup>GFAP<sup>+</sup>), proliferating GFP<sup>+</sup> (GFP<sup>+</sup>EdU<sup>+</sup>) and proliferating rNSCs (GFP<sup>+</sup>GFAP<sup>+</sup>EdU<sup>+</sup>) cells from E. (n=12 for each group).

(G) Representative images of brain section stained with GFAP, MCM2 and genetically labeled GFP in the DG in Sham, FeCl<sub>2</sub> and FeCl<sub>2</sub>+DFO group at 7 and 90 days after surgical manipulations. Scale bar = 10 μm.

(H) Quantification of numbers of GFP<sup>+</sup>GFAP<sup>+</sup>MCM2<sup>+</sup> cells from G. (n=12 for each group).

(I) Representative images of brain section stained with EdU, Ki67, and genetically labeled GFP in the DG in Sham, FeCl<sub>2</sub> and FeCl<sub>2</sub>+DFO group at 7 days after surgical manipulations. Scale bar = 10 μm.

(J) Quantified percentage of GFP<sup>+</sup>EdU<sup>+</sup>Ki67<sup>+</sup> (representing cells that entered cell cycle) and GFP<sup>+</sup>EdU<sup>+</sup>Ki67<sup>-</sup> (representing cells that exited cell cycle) cells from I. (n=12 for each group).

(K) Experiments timeline for cell differentiation analysis of Sham, Fe+Vehicle and Fe+DFO group.

(L) Representative images of brain section stained with EdU and NeuN in the DG of Saline, Fe and Fe+DFO group at 90 days. White arrows indicate NeuN<sup>+</sup>EdU<sup>+</sup> (adult-born neurons) cells. Scale bar = 20 μm.

(M) Quantification of numbers of NeuN<sup>+</sup>EdU<sup>+</sup> cells from L. (n=6 for each group).

(C, D, F, H, G, M) \*P < 0.05; \*\*P < 0.01; \*\*\*P < 0.001 vs corresponding Fe. Each experiment was repeated at least 3 times independently.



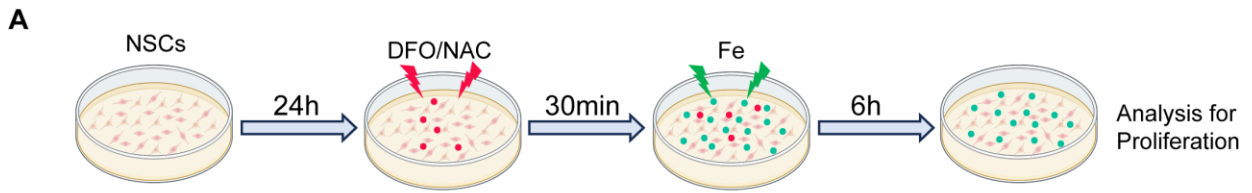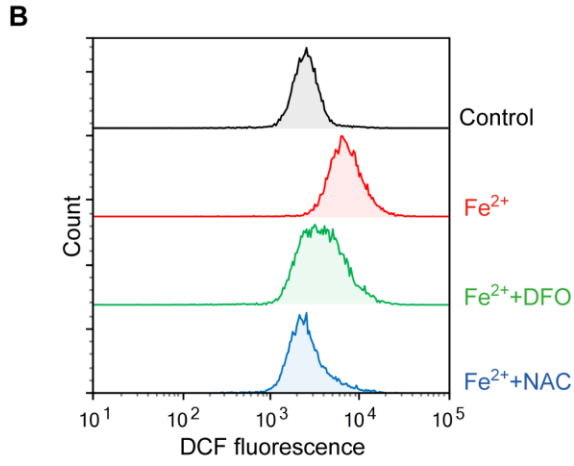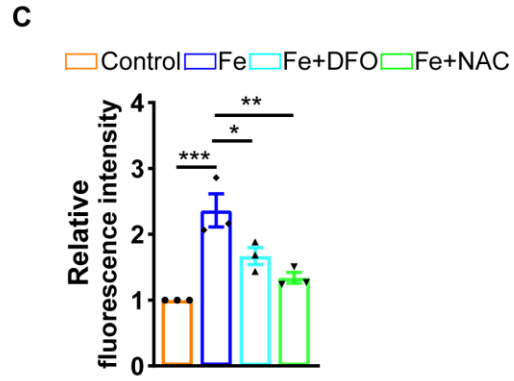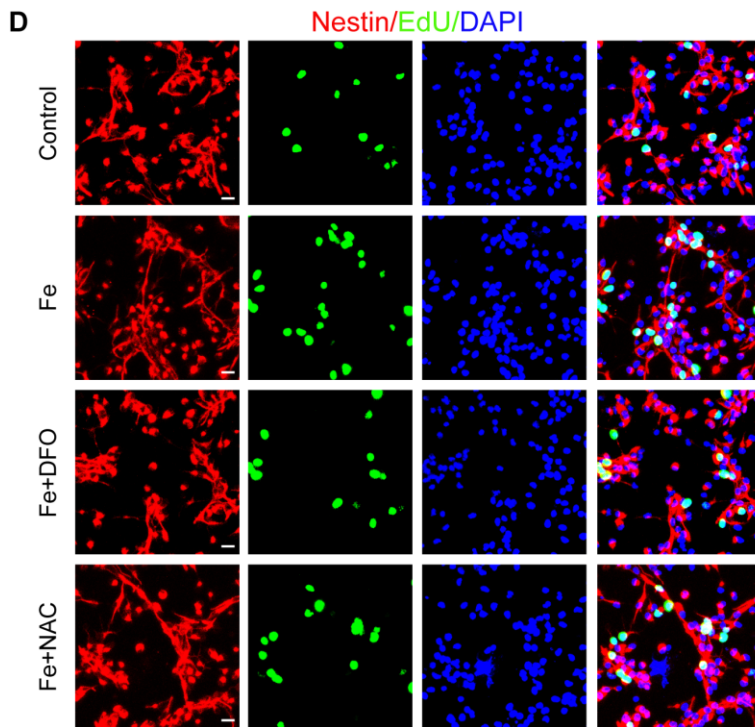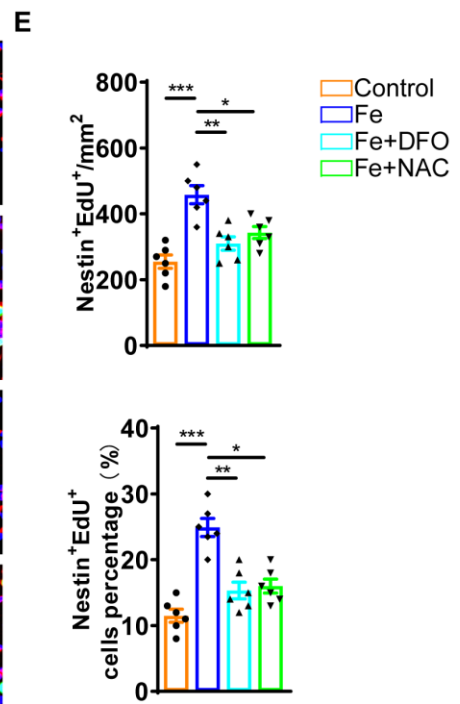

**Figure S4. ROS induced by iron activates proliferation of NSCs in vitro**

(A) Schematic diagram of Fe<sup>2+</sup> treated cultured NSCs group and experiments timeline for DFO, NAC treatment and cell proliferation analysis.

(B) ROS production assessment of Control, Fe<sup>2+</sup>, Fe<sup>2+</sup>+DFO and Fe<sup>2+</sup>+NAC and ROS were assessed by flow cytometry using H2DCFDA.

(C) Quantification of fluorescence intensity of H2DCFDA from B. (n=3 for each group).

(D) Representative images of cultured NSCs stained with Nestin and EdU after Fe<sup>2+</sup> treated for 6h. Scale bar = 20 μm.

(E) Quantification of numbers and percentage proliferating NSCs (Nestin<sup>+</sup>EdU<sup>+</sup>) cells from D. (n=6 for each group).

(C, E) \*P < 0.05; \*\*P < 0.01; \*\*\*P < 0.001 vs corresponding Fe. Each experiment was repeated at least 3 times independently.

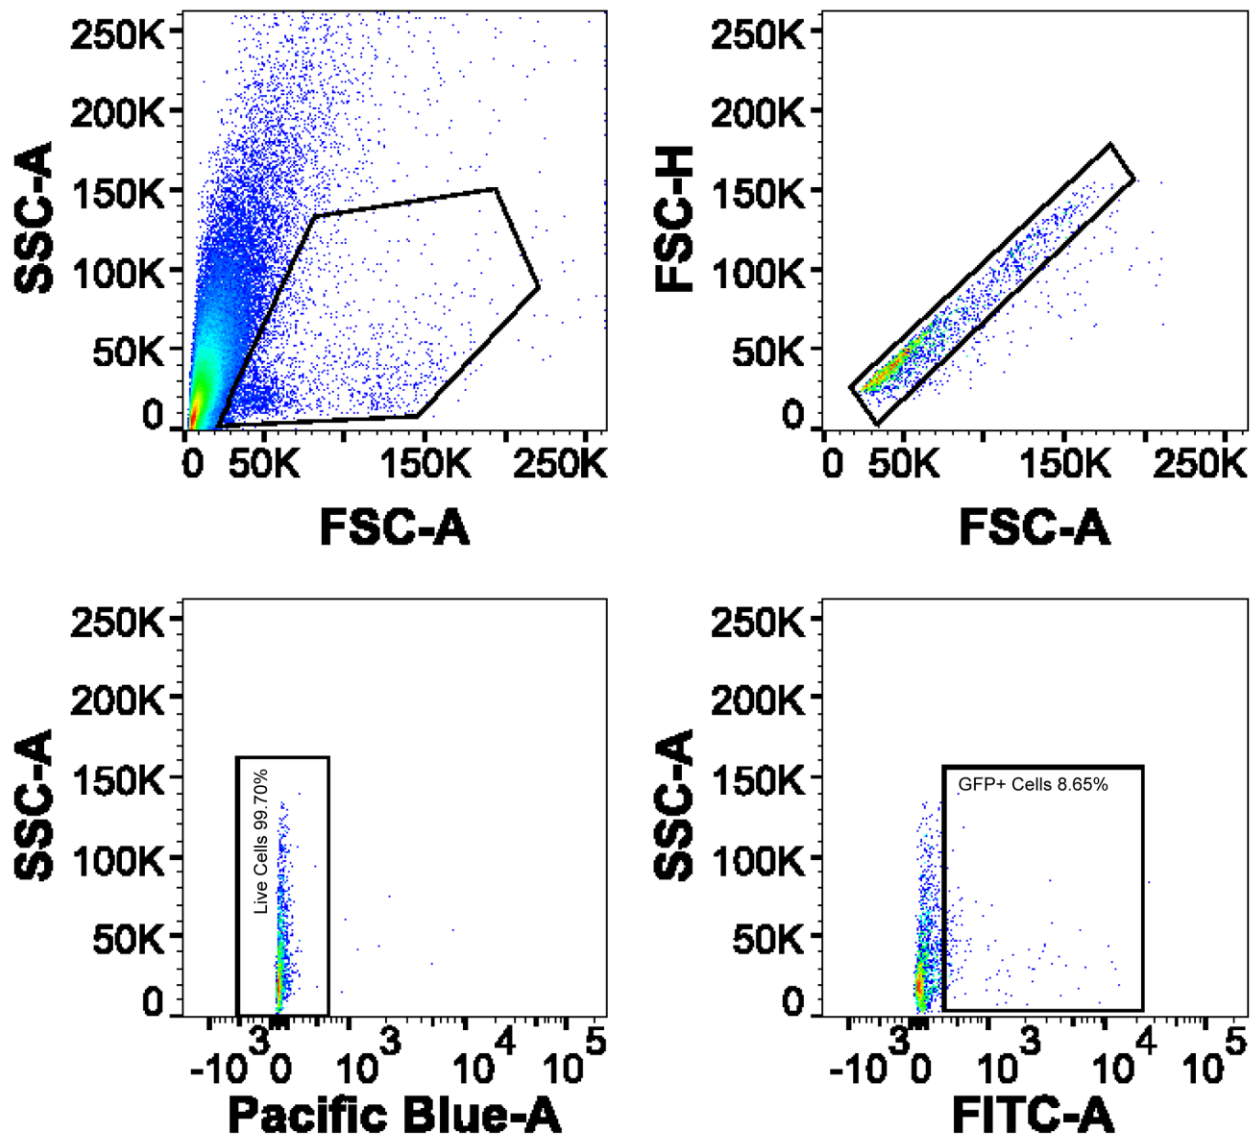

**Figure S5. Gating strategy for detecting GFP<sup>+</sup> cells of Nestin-GFP mice sorting from Sham and ICH.**

- (A) Gating for intact cells according to SSC-A and FSC-A.
- (B) Gating for single cells according to FSC-H and FSC-A.
- (C) Gating for live according to DAPI exclusion.
- (D) Gating for GFP<sup>+</sup> cells according to GFP reporter signal.

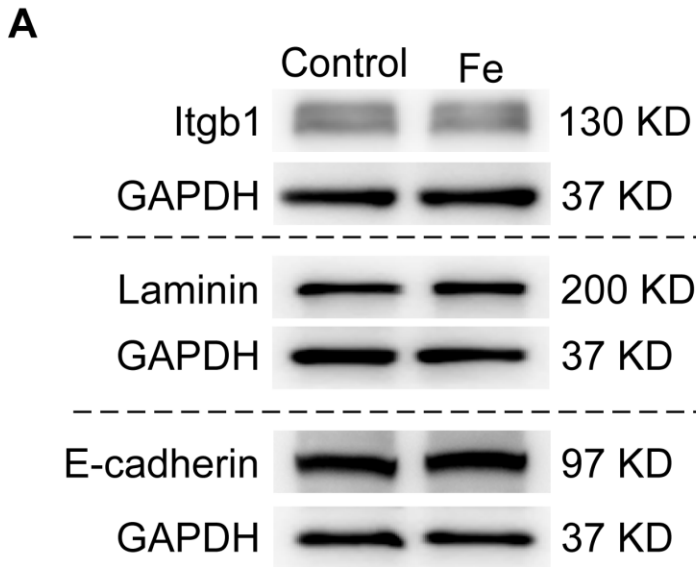

**B** □ Control □ Fe

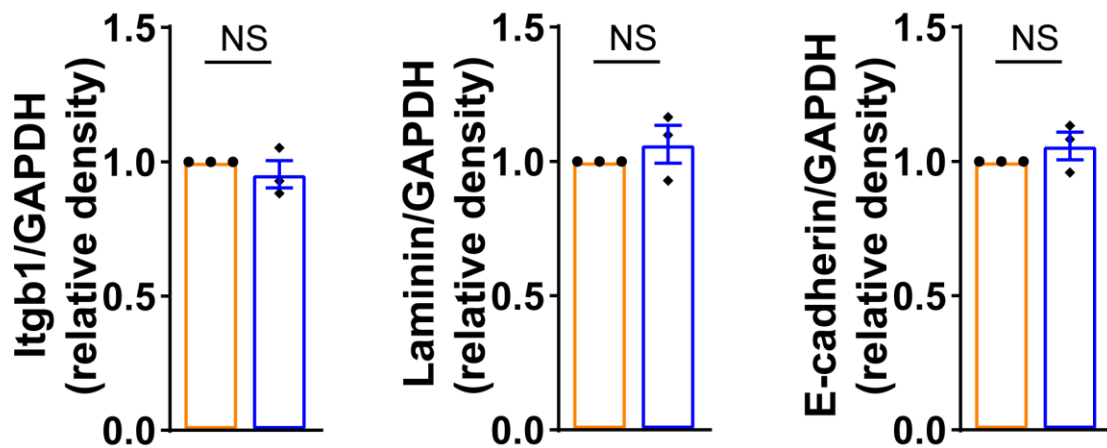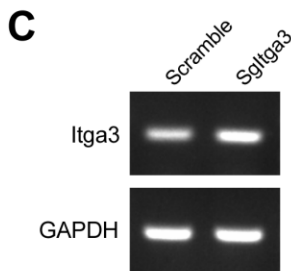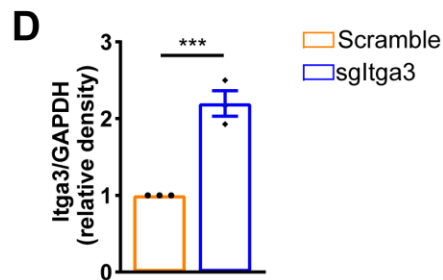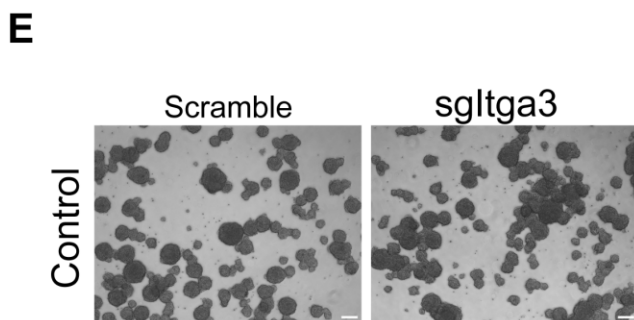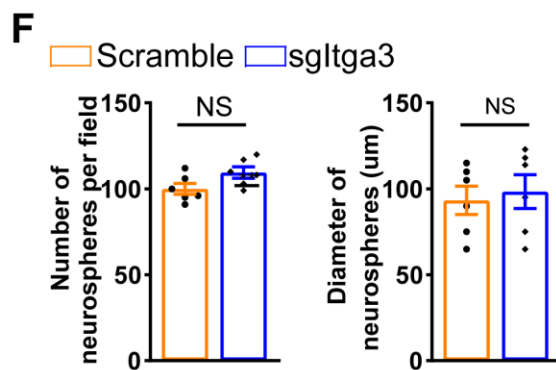

**Figure S6. There was no significant difference in the expression of adhesion related molecules in NSCs exposed to iron**

(A-B) The expression of Itgb1, Laminin, E-cadherin in cultured NSCs from Control and Fe<sup>2+</sup> group. GAPDH was served as the internal control. Semi-quantitative analysis of WB results. (n=3 for each group).

(C) RT-PCR showing Itga3 mRNA expression with Itga3 sgRNA transfection.

(D) Quantification of Itga3 mRNA expression from C. GAPDH was served as the internal control. (n=3 for each group).

(E) The phase-contrasted images depicting NSCs condition in Itga3 overexpression and Scramble group. Scale bar: 100μm.

(F) The number and the diameter of neurospheres from C. (n=6 for each group).

(B, D, F) \*\*\*P < 0.001 vs corresponding Control or Scramble. NS= no significance. Each experiment was repeated at least 3 times independently.
